# Supplementary material for: Efficient lateral-structure perovskite single crystal solar cells with high operational stability
Source: PubMed Central journal article supplement (PMC6959261; doi:10.1038/s41467-019-13998-2), 2020-01-14
Supplement: 41467_2019_13998_MOESM3_ESM.pdf [file 41467_2019_13998_MOESM3_ESM.pdf]

## Solar Cells Reporting Summary

Nature Research wishes to improve the reproducibility of the work that we publish. This form is intended for publication with all accepted papers reporting the characterization of photovoltaic devices and provides structure for consistency and transparency in reporting. Some list items might not apply to an individual manuscript, but all fields must be completed for clarity.

For further information on Nature Research policies, including our [data availability policy](#), see [Authors & Referees](#).

### ü Experimental design

#### Please check: are the following details reported in the manuscript?

##### 1. Dimensions

Area of the tested solar cells

Yes  
 No

For the single device area was 0.05 mm<sup>2</sup>, and for the multisection device area was 1.85 mm<sup>2</sup>. The information can be found in the Material and Device Characterization.

Method used to determine the device area

Yes  
 No

Defined by the area between anode and cathode.

##### 2. Current-voltage characterization

Current density-voltage (J-V) plots in both forward and backward direction

Yes  
 No

Supplementary Figure 1

Voltage scan conditions

*For instance: scan direction, speed, dwell times*

Yes  
 No

Reverse scan, 0.03 V/s, Dwell time: 0.333 s

Test environment

*For instance: characterization temperature, in air or in glove box*

Yes  
 No

Devices are measured in vacuum, air and glove box at room temperature.

Protocol for preconditioning of the device before its characterization

Yes  
 No

No preconditioning is required before characterization.

Stability of the J-V characteristic

*Verified with time evolution of the maximum power point or with the photocurrent at maximum power point; see [ref. 7](#) for details.*

Yes  
 No

Photocurrent output are measured by tracking the maximum power point (Figure 6g).

##### 3. Hysteresis or any other unusual behaviour

Description of the unusual behaviour observed during the characterization

Yes  
 No

There was weak hysteresis between backward scan and forward scan.

Related experimental data

Yes  
 No

Supplementary Figure 1

##### 4. Efficiency

External quantum efficiency (EQE) or incident photons to current efficiency (IPCE)

Yes  
 No

The light intensity in EQE measurement is too low to generate stable photo current in microscale lateral structured device.

A comparison between the integrated response under the standard reference spectrum and the response measure under the simulator

Yes  
 No

None liner photoresponse.

For tandem solar cells, the bias illumination and bias voltage used for each subcell

Yes  
 No

Single crystal perovskite solar cell is investigated in this work are not tandem solar cells.

##### 5. Calibration

Light source and reference cell or sensor used for the characterization

Yes  
 No

Simulated AM 1.5 G irradiation was produced by a Xenon lamp solar simulator (SOLARBEAM-02-3A, CROWNTECH.INC.). The light intensity was calibrated by a reference solar cell (SRC-1000-TC-K-QZ-C, VLSI Standards).

|                                                                                                                                                                                               |                                         |                                                                                                                                                       |
|-----------------------------------------------------------------------------------------------------------------------------------------------------------------------------------------------|-----------------------------------------|-------------------------------------------------------------------------------------------------------------------------------------------------------|
| Confirmation that the reference cell was calibrated and certified                                                                                                                             | <input checked="" type="checkbox"/> Yes | The reference silicon detector (SRC-1000-TC-K-QZ-C, VLSI Standards) was calibrated and NREL traceable.                                                |
|                                                                                                                                                                                               | <input type="checkbox"/> No             |                                                                                                                                                       |
| Calculation of spectral mismatch between the reference cell and the devices under test                                                                                                        | <input type="checkbox"/> Yes            | No calculation was used.                                                                                                                              |
|                                                                                                                                                                                               | <input checked="" type="checkbox"/> No  |                                                                                                                                                       |
| <b>6. Mask/aperture</b>                                                                                                                                                                       |                                         |                                                                                                                                                       |
| Size of the mask/aperture used during testing                                                                                                                                                 | <input checked="" type="checkbox"/> Yes | The information can be found in the Material and Device Characterization.                                                                             |
|                                                                                                                                                                                               | <input type="checkbox"/> No             |                                                                                                                                                       |
| Variation of the measured short-circuit current density with the mask/aperture area                                                                                                           | <input type="checkbox"/> Yes            | The efficiency distribution is provided in Figure 6c, d, e, f.                                                                                        |
|                                                                                                                                                                                               | <input checked="" type="checkbox"/> No  |                                                                                                                                                       |
| <b>7. Performance certification</b>                                                                                                                                                           |                                         |                                                                                                                                                       |
| Identity of the independent certification laboratory that confirmed the photovoltaic performance                                                                                              | <input type="checkbox"/> Yes            | No certification                                                                                                                                      |
|                                                                                                                                                                                               | <input checked="" type="checkbox"/> No  |                                                                                                                                                       |
| A copy of any certificate(s)<br><i>Provide in Supplementary Information</i>                                                                                                                   | <input type="checkbox"/> Yes            | No certification                                                                                                                                      |
|                                                                                                                                                                                               | <input checked="" type="checkbox"/> No  |                                                                                                                                                       |
| <b>8. Statistics</b>                                                                                                                                                                          |                                         |                                                                                                                                                       |
| Number of solar cells tested                                                                                                                                                                  | <input checked="" type="checkbox"/> Yes | A total of 20 single crystal perovskite solar cells were tested.                                                                                      |
|                                                                                                                                                                                               | <input type="checkbox"/> No             |                                                                                                                                                       |
| Statistical analysis of the device performance                                                                                                                                                | <input checked="" type="checkbox"/> Yes | Figure 6e and 6f.                                                                                                                                     |
|                                                                                                                                                                                               | <input type="checkbox"/> No             |                                                                                                                                                       |
| <b>9. Long-term stability analysis</b>                                                                                                                                                        |                                         |                                                                                                                                                       |
| Type of analysis, bias conditions and environmental conditions<br><i>For instance: illumination type, temperature, atmosphere humidity, encapsulation method, preconditioning temperature</i> | <input checked="" type="checkbox"/> Yes | in Figure 6g, the single crystal perovskite solar cell device was measured by tracking the photocurrent at its MPP condition under 1 Sun illumination |
|                                                                                                                                                                                               | <input type="checkbox"/> No             |                                                                                                                                                       |
